# Supplementary material for: Optimization of Extract Method for Cynomorium songaricum Rupr. by Response Surface Methodology
Source: Hindawi journal article supplement (doi:10.1155/2017/6153802), 2017-01-01
Supplement: f1 [file 6153802.f1.pdf]

Table S1 The specific concentration of gallic acid, protocatechuic acid and catechinic acid

| Name  | Origins                                    | Concentration of<br>protocatechuic acid(mg/g) | Concentration of gallic<br>acid(mg/g) | Concentration of<br>catechinic acid(mg/g) |
|-------|--------------------------------------------|-----------------------------------------------|---------------------------------------|-------------------------------------------|
| NAE-1 | Ejin Banner, Inner Mongolia, China         | 2.55272                                       | 2.86688                               | 1.86712                                   |
| NAE-2 | Ejin Banner, Inner Mongolia, China         | 2.59224                                       | 2.70930                               | 1.69581                                   |
| NAE-3 | Ejin Banner, Inner Mongolia, China         | 2.55702                                       | 2.56103                               | 0.83573                                   |
| NAZ-1 | Alashan Left Banner, Inner Mongolia, China | 1.42056                                       | 3.32633                               | 1.82363                                   |
| NAZ-2 | Alashan Left Banner, Inner Mongolia, China | 1.43432                                       | 3.00155                               | 1.52200                                   |
| NAZ-3 | Alashan Left Banner, Inner Mongolia, China | 1.54541                                       | 3.12402                               | 1.35943                                   |
| XH-1  | Hetian, Xinjiang, China                    | 1.16629                                       | 2.62403                               | 0.78713                                   |
| XH-2  | Hetian, Xinjiang, China                    | 0.74675                                       | 2.61937                               | 1.14990                                   |
| XH-3  | Hetian, Xinjiang, China                    | 1.12079                                       | 2.53212                               | 0.39335                                   |
| XT-1  | Tacheng, Xinjiang, China                   | 1.00659                                       | 3.68099                               | 2.80528                                   |
| XT-2  | Tacheng, Xinjiang, China                   | 0.97941                                       | 3.57341                               | 2.67895                                   |
| XT-3  | Tacheng, Xinjiang, China                   | 0.98018                                       | 3.52356                               | 2.98032                                   |
| XK-1  | Kashi, Xinjiang, China                     | 1.35155                                       | 4.03247                               | 1.00608                                   |
| XK-2  | Tacheng, Xinjiang, China                   | 1.40580                                       | 3.91257                               | 1.18352                                   |
| XK-3  | Tacheng, Xinjiang, China                   | 1.46745                                       | 3.77348                               | 0.95283                                   |
| QH-1  | Haixi, Qinghai, China                      | 1.39806                                       | 4.56203                               | 1.78351                                   |
| QH-2  | Haixi, Qinghai, China                      | 1.43219                                       | 4.48416                               | 1.69971                                   |
| QH-3  | Haixi, Qinghai, China                      | 1.41351                                       | 4.74657                               | 1.93041                                   |
| NG-1  | Guyuan, Ningxia, China                     | 1.07798                                       | 2.39748                               | 3.57698                                   |
| NG-2  | Guyuan, Ningxia, China                     | 0.99924                                       | 2.28950                               | 3.42690                                   |

|       |                        |         |         |         |
|-------|------------------------|---------|---------|---------|
| NG-3  | Guyuan, Ningxia, China | 1.02317 | 2.25548 | 3.48367 |
| GJG-1 | Guazhou, Gansu, China  | 1.32522 | 0.88451 | 0.39321 |
| GJG-2 | Guazhou, Gansu, China  | 1.29298 | 0.98505 | 0.39730 |
| GJG-3 | Guazhou, Gansu, China  | 1.33288 | 1.02836 | 0.52992 |
| GY-1  | Zhangye, Gansu, China  | 0.96658 | 1.17444 | 0.44799 |
| GY-2  | Zhangye, Gansu, China  | 0.98475 | 1.19542 | 0.39181 |
| GY-3  | Zhangye, Gansu, China  | 0.94647 | 0.68712 | 0.52948 |

---
